# Supplementary material
Source: publisher figshare collection journal article supplement (https://gsapubs.figshare.com/ndownloader/files/23293424)
Supplement: Supplementary file 1 [file 23293424]

Appendix A. Expanded Analytical data of terrestrial cosmogenic nuclide  $^{10}\text{Be}$  geochronology.

| Sample * | Sample type   | Elevation (m) | Number of clasts analyzed | Average clast size (cm) | Standard deviation of clasts | Depth to top of sample (cm) | Thickness (cm) | Production Rate <sup>†</sup> (atoms/g*yr) |       | Shielding factor | Denudation Rate <sup>‡</sup> (cm/ka) | Quartz (g) | AMS values      |                              | 10Be concentration (atoms/gram) |                                | $^{10}\text{Be}$ error (1 $\sigma$ ) | Apparent age <sup>#</sup> (ka) | Apparent age error (2 $\sigma$ ) | Location ** |
|----------|---------------|---------------|---------------------------|-------------------------|------------------------------|-----------------------------|----------------|-------------------------------------------|-------|------------------|--------------------------------------|------------|-----------------|------------------------------|---------------------------------|--------------------------------|--------------------------------------|--------------------------------|----------------------------------|-------------|
|          |               |               |                           |                         |                              |                             |                | Spallation                                | Muons |                  |                                      |            | Be Carrier (mg) | $^{10}\text{Be}/^9\text{Be}$ | $^{10}\text{Be}$ concentration  | $^{10}\text{Be}$ concentration |                                      |                                |                                  |             |
| Qt5b-1L  | depth profile | 227           | 57                        | 1.85                    | 1.32                         | 0                           | 10             | 5.09                                      | 0.20  | 0.9994           | 0-0.1                                | 36.7800    | 0.4153          | 5.26E-14                     | 1.81E-15                        | 3.73E+04                       | 1.76E+03                             | na                             | na                               | 3813529     |
| Qt5b-2L  | depth profile | 227           | 77                        | 1.83                    | 1.13                         | 30                          | 10             | 5.09                                      | 0.20  | 0.9994           | 0-0.1                                | 43.8300    | 0.4153          | 5.38E-14                     | 1.50E-15                        | 3.21E+04                       | 1.02E+03                             | na                             | na                               | 3813529     |
| Qt5b-3L  | depth profile | 227           | 57                        | 2.37                    | 0.83                         | 60                          | 10             | 5.09                                      | 0.20  | 0.9994           | 0-0.1                                | 38.6800    | 0.3866          | 5.16E-14                     | 1.62E-15                        | 3.22E+04                       | 1.19E+03                             | na                             | na                               | 3813529     |
| Qt5b-4L  | depth profile | 227           | 45                        | 2.61                    | 0.79                         | 90                          | 10             | 5.09                                      | 0.20  | 0.9994           | 0-0.1                                | 44.9907    | 0.3760          | 6.03E-14                     | 1.83E-15                        | 3.15E+04                       | 1.24E+03                             | na                             | na                               | 3813529     |
| Qt5b-5L  | depth profile | 227           | 80                        | 1.70                    | 0.96                         | 130                         | 10             | 5.09                                      | 0.20  | 0.9994           | 0-0.1                                | 46.0739    | 0.3760          | 3.42E-14                     | 1.16E-15                        | 1.65E+04                       | 9.13E+02                             | na                             | na                               | 3813529     |
| 6a-1a    | boulder       | 231           | na                        | na                      | na                           | 0                           | 2              | 4.66                                      | 0.19  | 0.9989           | 0-0.006                              | 49.3600    | 0.4300          | 3.71E-13                     | 3.50E-14                        | 1.85E+05                       | 2.62E+04                             | 42431                          | 15184                            | 3813527     |
| 6a-2a    | boulder       | 231           | na                        | na                      | na                           | 0                           | 2              | 4.66                                      | 0.19  | 0.9989           | 0-0.006                              | 41.6793    | 0.4400          | 3.70E-13                     | 3.76E-14                        | 2.61E+05                       | 3.29E+04                             | 67032                          | 24642                            | 3813527     |
| 6a-2L    | boulder       | 231           | na                        | na                      | na                           | 0                           | 2              | 4.66                                      | 0.19  | 0.9989           | 0-0.006                              | 19.7800    | 0.4172          | 1.56E-13                     | 3.65E-15                        | 2.20E+05                       | 1.70E+04                             | 53011                          | 11002                            | 3813527     |
| 6a-3     | boulder       | 231           | na                        | na                      | na                           | 0                           | 2              | 4.66                                      | 0.19  | 0.9989           | 0-0.006                              | 19.9700    | 0.4226          | 1.43E-13                     | 4.25E-15                        | 2.02E+05                       | 1.67E+04                             | 47430                          | 10196                            | 3813527     |
| 6a-5L    | boulder       | 231           | na                        | na                      | na                           | 0                           | 2              | 4.66                                      | 0.19  | 0.9989           | 0-0.006                              | 39.9017    | 0.4140          | 2.44E-13                     | 5.68E-15                        | 1.69E+05                       | 2.06E+04                             | 39078                          | 11810                            | 3813527     |
| 6a-6a    | boulder       | 231           | na                        | na                      | na                           | 0                           | 2              | 4.66                                      | 0.19  | 0.9989           | 0-0.006                              | 56.6335    | 0.3000          | 3.87E-13                     | 6.05E-14                        | 1.37E+05                       | 2.57E+04                             | 29545                          | 13022                            | 3813527     |
| Qt1-01   | depth profile | 285           | 94                        | 1.92                    | 0.78                         | 0                           | 2              | 5.32                                      | 0.20  | 0.9995           | 0-0.1                                | 37.8593    | 0.4379          | 5.44E-13                     | 1.25E-14                        | 4.18E+05                       | 1.48E+04                             | na                             | na                               | 3799362     |
| Qt1-02   | depth profile | 370           | 60                        | 2.00                    | 1.06                         | 35                          | 10             | 5.32                                      | 0.20  | 0.9995           | 0-0.1                                | 56.1900    | 0.2229          | 1.23E-12                     | 2.79E-14                        | 3.23E+05                       | 1.13E+04                             | na                             | na                               | 3799362     |
| Qt1-03   | depth profile | 370           | 59                        | 1.87                    | 1.04                         | 70                          | 10             | 5.32                                      | 0.20  | 0.9995           | 0-0.1                                | 40.4700    | 0.4364          | 2.86E-13                     | 6.59E-15                        | 2.04E+05                       | 7.24E+03                             | na                             | na                               | 3799362     |
| Qt1-04   | depth profile | 370           | 101                       | 1.84                    | 0.96                         | 170                         | 10             | 5.32                                      | 0.20  | 0.9995           | 0-0.1                                | 38.4900    | 0.4379          | 9.37E-14                     | 2.54E-15                        | 6.93E+04                       | 2.71E+03                             | na                             | na                               | 3799362     |
| Qt1-05   | depth profile | 370           | 87                        | 1.85                    | 1.11                         | 220                         | 10             | 5.32                                      | 0.20  | 0.9995           | 0-0.1                                | 44.6000    | 0.2231          | 1.56E-13                     | 4.25E-15                        | 4.98E+04                       | 2.00E+03                             | na                             | na                               | 3799362     |

\*"L" or "A" at end of name indicates where the sample was run on the AMS; Arizona or Lawrence Livermore

<sup>†</sup>Production rates are from the CRONUS calculator and the script of Hidy et al. (2010).

<sup>‡</sup>Denudation rates show the ranges used in models. Please see text for details.

<sup>#</sup>Apparent age is based on Cronus results for 0 erosion model. Depth profile ages are shown in Appendix Table 2

\*\*Locations are given in Universal Transverse Mercator (UTM) coordinates system zone 11, using World Geodetic System 1984 (WGS84) datum.

# DGC $^{10}\text{Be}$ depth profile simulator

version 1.0

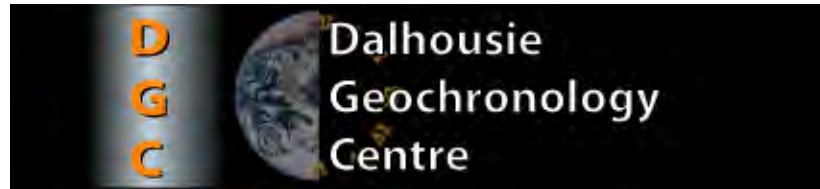

## Site specific information:

### location:

latitude (deg)

xx.xxx

34.30972

longitude (deg)

xxx.xxx

-118.81027

altitude (m)

xxxx

285

### topographic/geometric shielding:

The topographic shielding factor is 1 (no effect) as a default. If shielding has been measured, then an ascii text or Excel file can be loaded into the worksheet. To do this, right click on the disk icon below and select "Properties". From here you may specify your file type and path. This file should have two columns of data. Column 1 should contain a list of angular measurements of the horizon; column 2 should contain a list of azimuths associated with each horizon measurement. The program then makes a linear interpolation of the horizon based on these values and calculates a shielding factor. Additional shielding from samples collected on a dipping surface can be included if the strike and dip of the surface has been measured. If you already know your net topographic shielding factor, enter the value in the "define" field.

dipping surface?

strike (0 - 360)

0

dip (0-90; right hand rule)

0

horizon

☐ user defined shielding

☒ File input

...\DDCN\horizon.xls

or, define factor

0.979

(fraction)

 shielding macro

Calculated or imputed shielding factor:  $S_T = 0.9984626$

Horizon

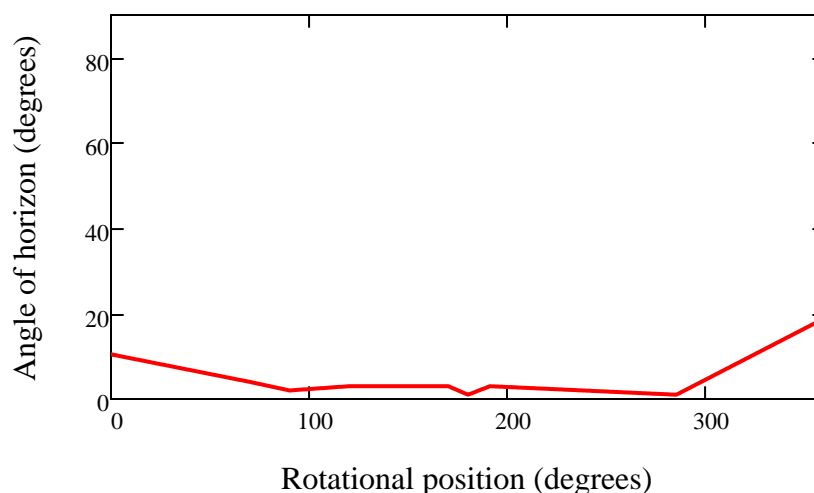



**cover (e.g. snow, loess etc.):**

This is your estimate of the percent change in production rate due to assumed periodic cover. Default is 1 (no effect).

cover factor (fraction)



## Spallogenic production rate:

### scaling scheme:

- ☒ Stone 2000 after Lal 1991  
☐ I know my spallogenic production rate  (atoms g<sup>-1</sup> a<sup>-1</sup>)

Reference production rate:  (atoms g<sup>-1</sup> a<sup>-1</sup>)

## Isotope:

- ☒ <sup>10</sup>Be (1.387 Ma)  
☐ <sup>26</sup>Al

## Production by muons:

This scheme follows the theoretical equations of Heisinger et al. 2002a, 2002b for production of muons vs depth. The approach of Balco 2008 is adopted to generate production rates via negative muon capture and fast muons at any given depth and altitude. A two-term exponential best fit for fast muons and a three-term exponential best fit for negative muon capture is then determined over the depth range defined below and for the altitude of the sampling location. The displayed depth range is for rock with a conservative high density of 2.7g/cm<sup>3</sup>, so in most cases the fitted depth will be deeper than indicated. The graphs below show the quality of each fit to the Heisinger equations over the specified mass-depth. A default depth range is set at 20 m. At a minimum, the depth range over which the muon terms are fit should be equal to the depth of your deepest sample plus the maximum net erosion of the surface.

depth of muon fit:  (m)

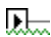

muon production

Mean relative error (%) of fit over depth range (fast muons): mean\_muf\_err = 0.0517967

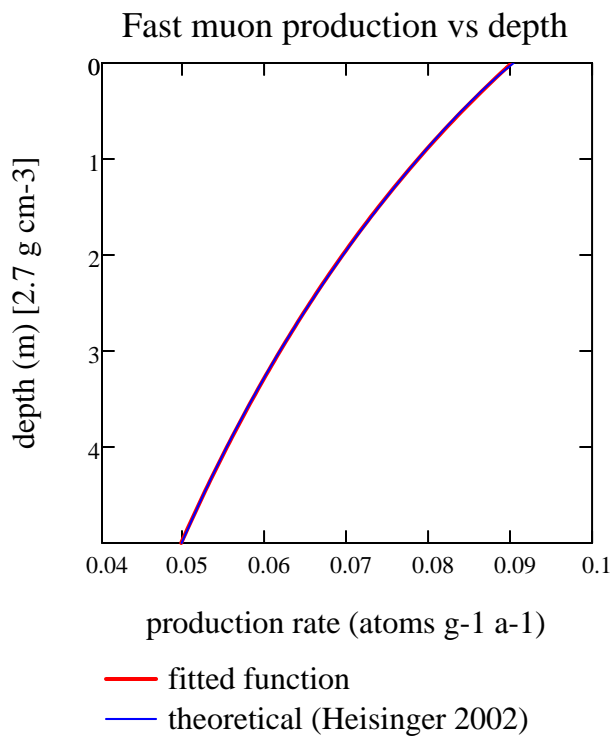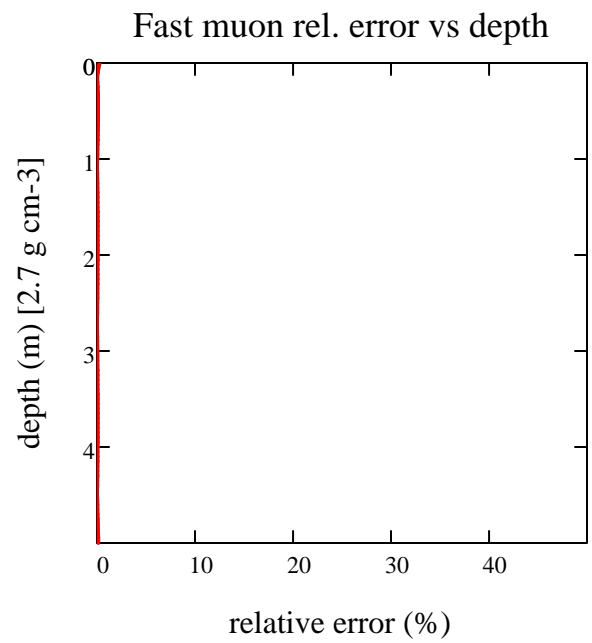

Mean relative error (%) of fit over depth range (fast muons):  $\text{mean\_mun\_err} = 0.2065714$

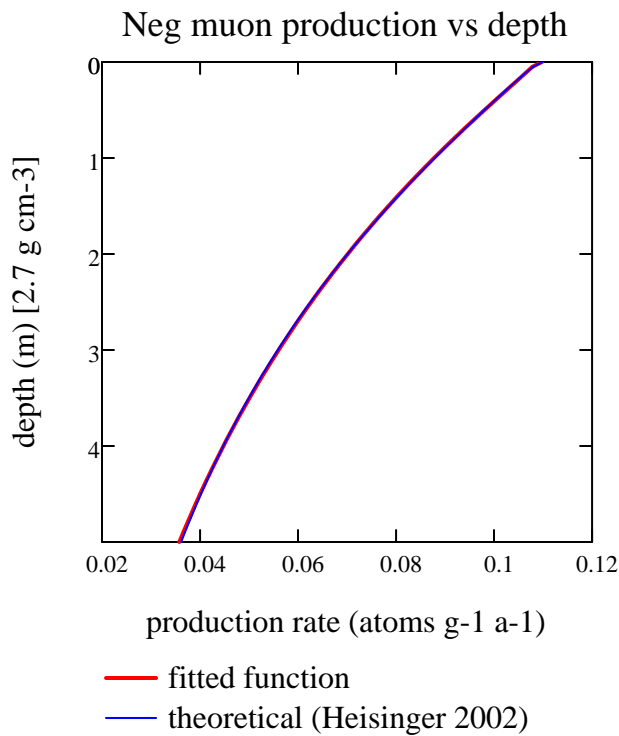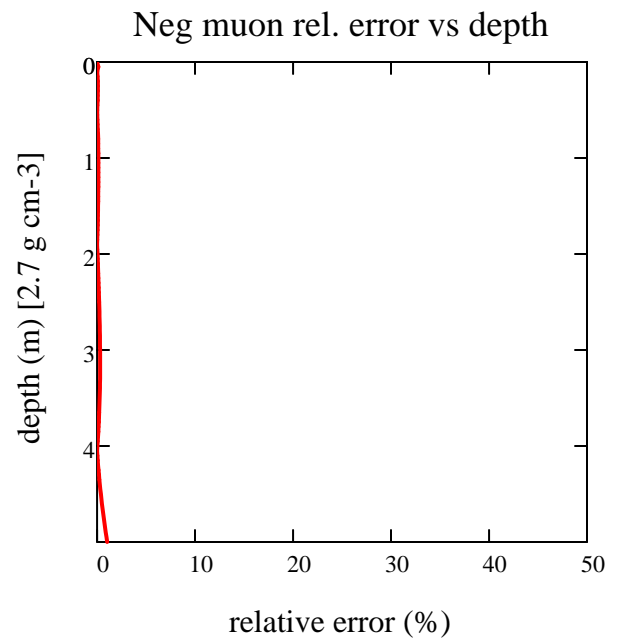

scaling macro

Calculated spallogenic production rate at surface (including shielding and cover):

$P_T = 5.3237349$  (atoms g<sup>-1</sup> a<sup>-1</sup>)

Calculated total muonic production rate at surface (muon shielding ignored):

$M_T = 0.2001982$  (atoms g<sup>-1</sup> a<sup>-1</sup>)

How would you like to treat error in the production rates?

To treat as constant, enter the same high and low value, and 0 for the error; to treat as stochastic between high and low end members, enter the high and low values, and 0 for the error; to treat as normally distributed about a mean value, enter the mean value in both the high and low fields, and your estimate for the relative error. Since the total muogenic production rate is approximated by five exponential terms, only a normally distributed percent error is currently allowed. The entered value is applied to each muon production term.

spallogenic production rate:

low  (atoms g<sup>-1</sup> a<sup>-1</sup>)

high  (atoms g<sup>-1</sup> a<sup>-1</sup>)

1σ error  (%)

muonic production rate:

1σ error  (%)

attenuation length for neutrons:

the recommended attenuation length for your latitude is: Λ<sub>n</sub> = 160 (g cm<sup>-2</sup>)

neutrons

low  (g cm<sup>-2</sup>)

high  (g cm<sup>-2</sup>)

1σ error  (g cm<sup>-2</sup>)

Uncertainty in half life?

Half life is normally distributed about the 1σ error specified (enter 0 to not include this error).

1σ error  (%)

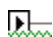

## Profile Data:

### depth of each sample:

Enter depths to the **top** of each sample (from shallowest to deepest) in your profile. Separate each value with a space.

  
(cm)

### thickness of each sample:

Enter thickness values for each sample in your profile. Separate each value with a space. Make sure the order of thicknesses matches those you entered in the "depth of samples" field

  
(cm)

### concentration of each sample:

Enter concentration values for each sample in your profile. Separate each value with a space. Make sure the order of values matches those you entered in the "depth of samples" field

  
(atoms g<sup>-1</sup>)

### 1 $\sigma$ total measurement error for each sample concentration:

Enter 1 sigma errors in concentration for each sample in your profile. Separate each value with a space. Make sure the order of values matches those you entered in the "depth of samples" field.

  
(fraction)

### Optional data input from file:

You may load your sample data from a text or Excel file rather than using the manual inputs above. To do this, first select the "file input" option below and then right click on the disk icon and select "Properties". From here you may specify your file type and path. Your data should be formatted as follows. Column order: sample depths, sample thicknesses, sample concentrations, 1 $\sigma$  measurement error. They should be in the same units as described above. The rows should be ordered by sample depth (from shallowest to deepest).

- ☐ Manual input
- ☒ File input

... \DDCNconc\_1.xls

| depth (cm) | thickness (cm) | concentration (atoms g <sup>-1</sup> ) | 1σ concentration error (fraction) |
|------------|----------------|----------------------------------------|-----------------------------------|
|------------|----------------|----------------------------------------|-----------------------------------|

|                                                            |                                                           |                                                                                                    |                                                                                      |
|------------------------------------------------------------|-----------------------------------------------------------|----------------------------------------------------------------------------------------------------|--------------------------------------------------------------------------------------|
| $Z = \begin{pmatrix} 35 \\ 70 \\ 170 \\ 220 \end{pmatrix}$ | $Th = \begin{pmatrix} 10 \\ 10 \\ 10 \\ 10 \end{pmatrix}$ | $N = \begin{pmatrix} 322904.234447 \\ 204151.347841 \\ 69266.305216 \\ 49804.055997 \end{pmatrix}$ | $Er = \begin{pmatrix} 0.035127 \\ 0.0354599 \\ 0.0391348 \\ 0.0400842 \end{pmatrix}$ |
|------------------------------------------------------------|-----------------------------------------------------------|----------------------------------------------------------------------------------------------------|--------------------------------------------------------------------------------------|

## Bulk Density:

You may vary bulk density with depth by entering parameters for a step function describing measured or assumed changes in density with depth (e.g., if you measured density to be  $2.1 \pm 0.2 \text{ g cm}^{-3}$  between 0-30 cm,  $2.3 \pm 0.1 \text{ g cm}^{-3}$  between 30-60 cm, and  $2.4 \pm 0.2 \text{ g cm}^{-3}$  at depths greater than 60 cm, then you would enter the numbers 0 30 60--space delimited--in the "depths" field, the numbers 2.1 2.3 2.4 in the "densities" field, and the numbers 0.2 0.1 0.2 in the "density errors" field). You may also treat bulk density as a constant with depth; you can choose either a random or normal distribution for this constant value. As a check, your depth function is displayed in the plots below.

Constant density with depth; values varies randomly or normally:

low  (g cm<sup>-3</sup>)

high  (g cm<sup>-3</sup>)

1 $\sigma$  error  (g cm<sup>-3</sup>)

Measured values for densities at different depths; values are normally distributed (do not use for constant density with depth):

depths  (cm)

densities  (g cm<sup>-3</sup>)

1 $\sigma$  density errors  (g cm<sup>-3</sup>)

 density macro

Measured Density vs. Depth

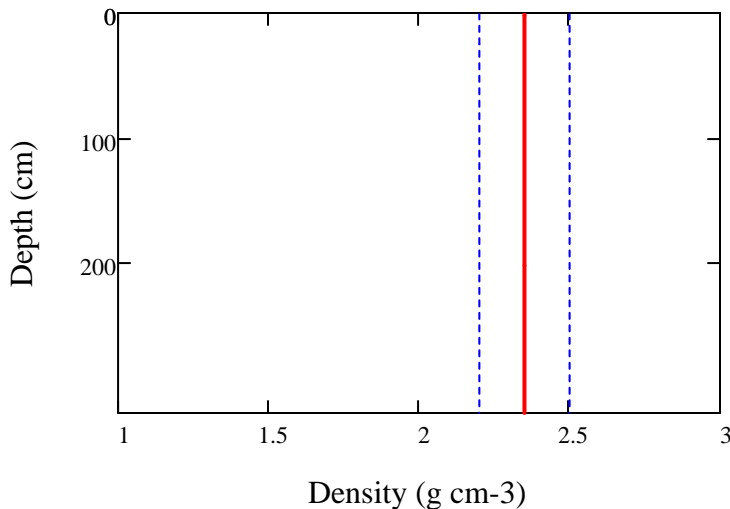

Cumulative Density (Bulk) vs. Depth

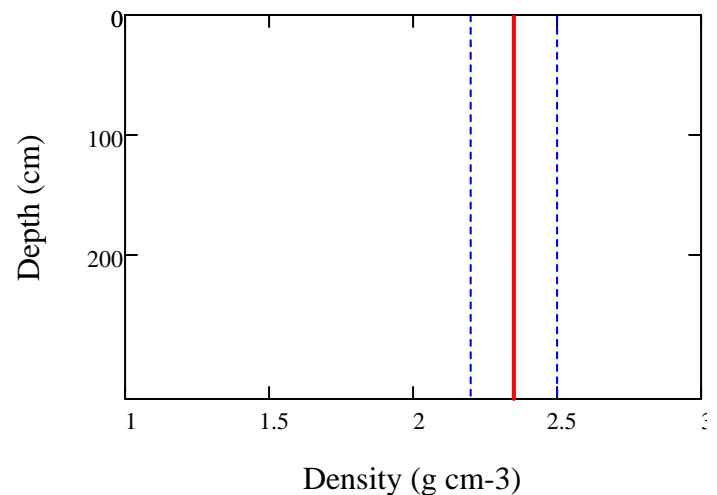

## Monte Carlo Simulator:

### parameter values for simulation:

In the fields below, enter boundary conditions for the parameters you wish to stochastically simulate. To specify a known value for a parameter, enter the expected value in both the "low" and "high" fields; for this option you will have to enter  $1\sigma$  relative error in the expected value as well. You may constrain the simulation by erosion rate, as well as erosion.

|                  | age                                 |     | net erosion                      |      | erosion rate                    |                        | inheritance                        |                          |
|------------------|-------------------------------------|-----|----------------------------------|------|---------------------------------|------------------------|------------------------------------|--------------------------|
| low              | <input type="text" value="50000"/>  | (a) | <input type="text" value="-10"/> | (cm) | <input type="text" value="0"/>  | (cm ka <sup>-1</sup> ) | <input type="text" value="0"/>     | (atoms g <sup>-1</sup> ) |
| high             | <input type="text" value="150000"/> | (a) | <input type="text" value="10"/>  | (cm) | <input type="text" value="0"/>  | (cm ka <sup>-1</sup> ) | <input type="text" value="50000"/> | (atoms g <sup>-1</sup> ) |
| 1 $\sigma$ error | <input type="text" value="0"/>      | (a) |                                  |      | <input type="text" value=".4"/> | (cm ka <sup>-1</sup> ) | <input type="text" value="0"/>     | (atoms g <sup>-1</sup> ) |

### random permutations:

The simulation works by creating profiles from values sampled with the desired distribution from each of the above parameters. The total number of profiles needed to get a good grasp of your solution space depends on how well you can constrain each of the parameters. Thus, it is more useful to specify a population of profiles that fit within a certain degree of confidence for your data, than to specify a number of total random profiles to create. This simulation will generate a profile, generate a reduced chi-squared value from that profile, and determine if that value is as good or better than the value generated from the data in your profile at the confidence window you specify; it will then continue until (n) profiles pass this chi-squared test. The total number of profiles needed to collect (n) "good" profiles is also displayed (m).

desired confidence ( $\sigma$ ):

define chi-squared:

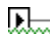

**Max chi-squared value that will be collected\*:**       $\chi^2 = 4$

\*The simulation will only look for solutions with a lower reduced chi-squared value than that shown above. If your profile data is significantly scattered, then you may not be able to obtain low enough chi-squared values for certain confidence levels. In this case, it will be necessary to run the simulation at a higher cutoff for the chi-squared statistic. Although counter-intuitive, increasing your desired confidence level accomplishes this. This is easier to think of in terms of fitting curves to data points with error bars. A dataset may not allow any theoretical profile to fit the  $1\sigma$  (68% confidence) data error, but allow profiles to fit the larger  $2\sigma$  (95.4% confidence) error. Incidentally, a higher confidence results in a faster simulation as it is easier to find possible solutions within the larger error window.

n

**number of profiles within specified confidence:**

100000

note: the best way to use this simulator is to start with low (n) values and do quick test simulations to tune the model to your data before running a very long high (n) value simulation. This allows you to do three things: 1) you can check the graphs below to see if the ranges you chose for your simulated parameters agree with the span of possible solutions for the parameter and then increase or decrease those ranges accordingly, 2) you can get an estimate for how long your simulation will take at higher (n) values (simulation time is linear), and 3) in the unfortunate circumstance of highly scattered data, you can run a quick test to see if it is even possible to find solutions better than your chi-squared cutoff (if it takes the program more than minute to find just 1 solution, then it probably will not be very useful for you to continue at that level of confidence). An (n) value of at least 100,000 is recommended for any final estimate of a given parameter.

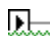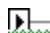



## Results:

**total number of simulated profiles:**  $m = 44716350$

**Mode, mean, and median values for age, inheritance, and erosion rate:**

|                        |                                            |                                                                           |                                                                          |
|------------------------|--------------------------------------------|---------------------------------------------------------------------------|--------------------------------------------------------------------------|
| mean values:           | $AGE_{\text{mean}} = 99.6 \cdot \text{ka}$ | $INH_{\text{mean}} = 1.79 \cdot 10^4 \cdot \frac{\text{atoms}}{\text{g}}$ | $E_{\text{rate}}_{\text{mean}} = -0 \cdot \frac{\text{cm}}{\text{ka}}$   |
| median values:         | $AGE_{\text{med}} = 99.3 \cdot \text{ka}$  | $INH_{\text{med}} = 1.80 \times 10^4 \cdot \frac{\text{atoms}}{\text{g}}$ | $E_{\text{rate}}_{\text{med}} = 0 \cdot \frac{\text{cm}}{\text{ka}}$     |
| modal values:          | $AGE_{\text{mo}} = 99.6 \cdot \text{ka}$   | $INH_{\text{mo}} = 1.80 \times 10^4 \cdot \frac{\text{atoms}}{\text{g}}$  | $E_{\text{rate}}_{\text{mo}} = 0.08 \cdot \frac{\text{cm}}{\text{ka}}$   |
| lowest $\chi^2$ value: | $AGE_{\chi} = 102.2 \cdot \text{ka}$       | $INH_{\chi} = 2.07 \times 10^4 \cdot \frac{\text{atoms}}{\text{g}}$       | $E_{\text{rate}}_{\chi} = -0 \cdot \frac{\text{cm}}{\text{ka}}$          |
| maximum value:         | $AGE_{\text{max}} = 124.4 \cdot \text{ka}$ | $INH_{\text{max}} = 2.95 \times 10^4 \cdot \frac{\text{atoms}}{\text{g}}$ | $E_{\text{rate}}_{\text{max}} = 0.1 \cdot \frac{\text{cm}}{\text{ka}}$   |
| minumum value:         | $AGE_{\text{min}} = 84.4 \cdot \text{ka}$  | $INH_{\text{min}} = 7.10 \times 10^3 \cdot \frac{\text{atoms}}{\text{g}}$ | $E_{\text{rate}}_{\text{min}} = -0.12 \cdot \frac{\text{cm}}{\text{ka}}$ |

The range in age, inheritance, and erosion values shown in these plots represent the range over your specified confidence

Age distribution

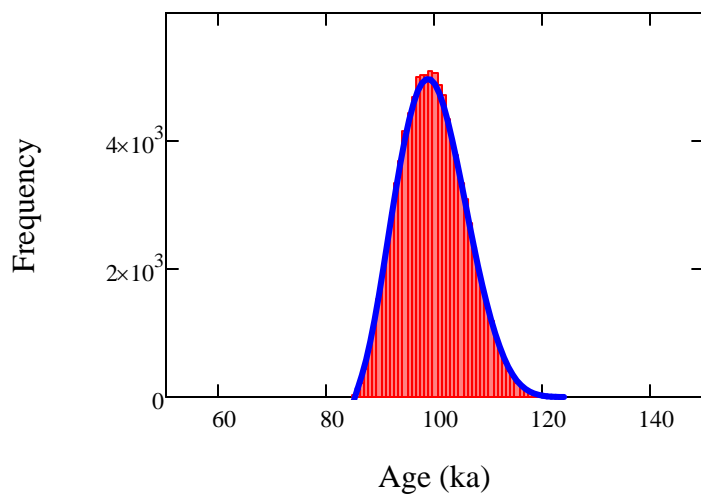

Age vs. Chi-Squared

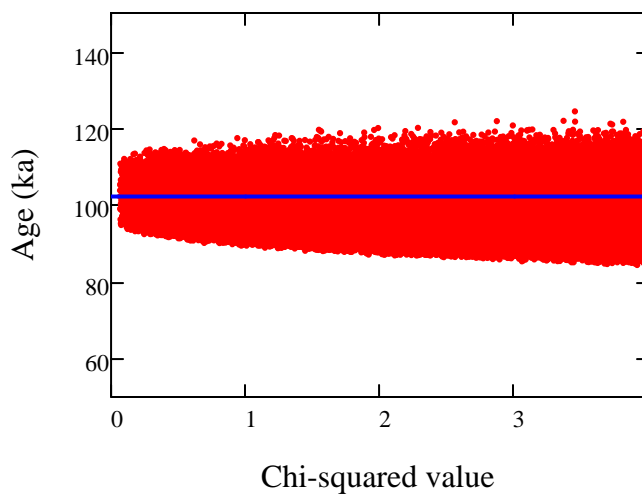

Inheritance distribution

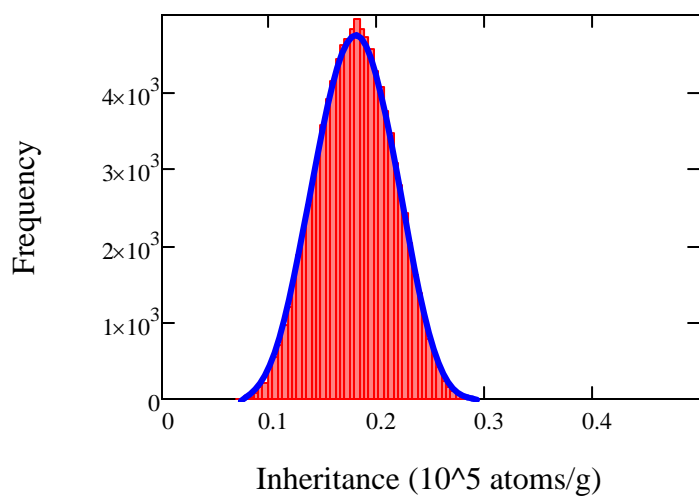

Inheritance vs. Chi-Squared

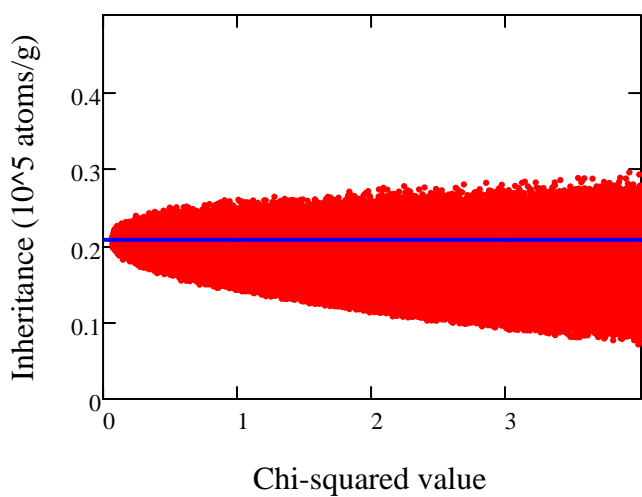

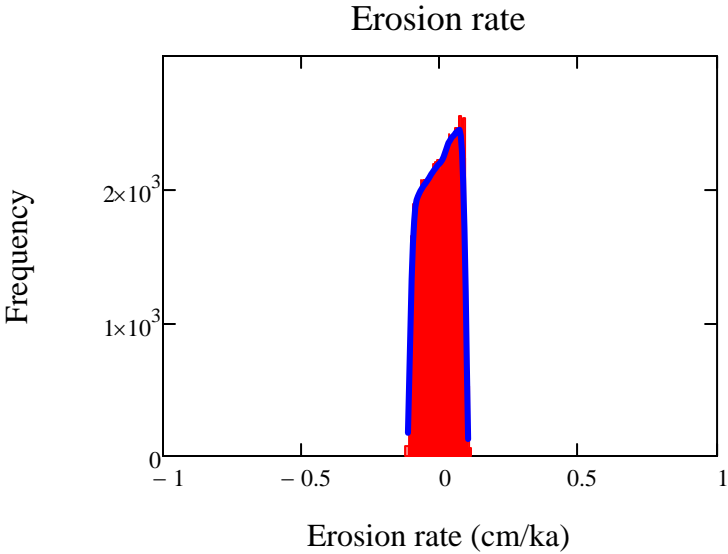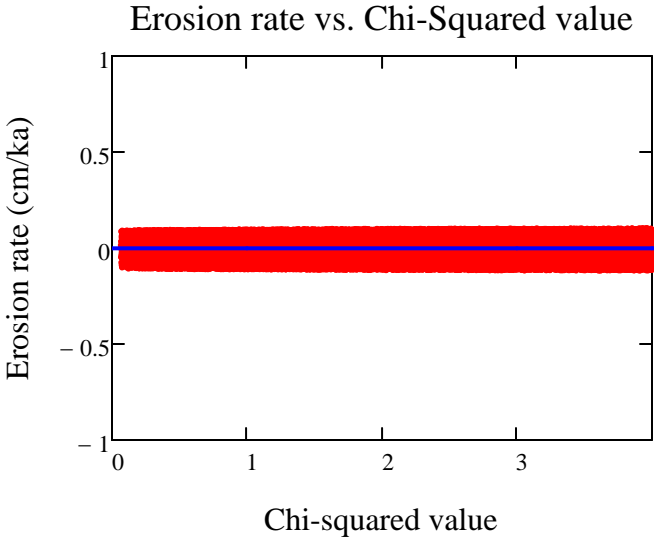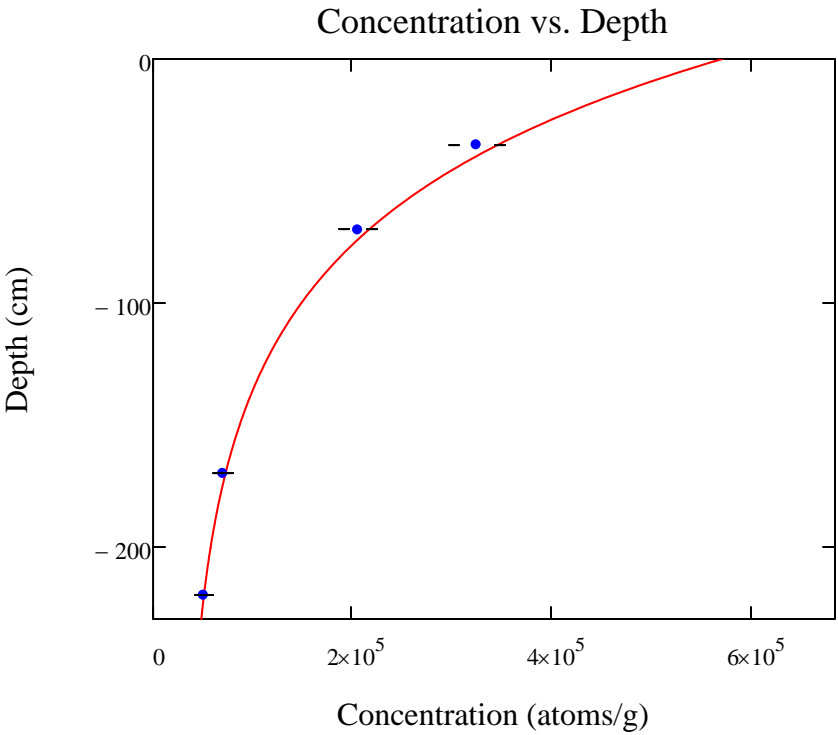

parameters yielding best fit (lowest  $\chi^2$  value):

|                              |                                                                             |
|------------------------------|-----------------------------------------------------------------------------|
| $\chi^2$ value:              | $\text{chisqrs}_0 = 0.0651586$                                              |
| age:                         | $\text{times}_0 = 102.2 \cdot \text{ka}$                                    |
| erosion rate:                | $\text{erosates}_0 = -0.001 \cdot \frac{\text{cm}}{\text{ka}}$              |
| inheritance:                 | $\text{inhers}_0 = 2.07 \times 10^4 \cdot \frac{\text{atoms}}{\text{g}}$    |
| neutron atten. length:       | $\text{neut\_attens}_0 = 158 \cdot \frac{\text{g}}{\text{cm}^2}$            |
| spallogenic production rate: | $\text{prates}_0 = 5.32 \cdot \frac{\text{atoms}}{\text{g} \cdot \text{a}}$ |
| muogenic production rate:    | $\text{murates}_0 = 0.2 \cdot \frac{\text{atoms}}{\text{g} \cdot \text{a}}$ |
| density:                     | $\text{density} = 2.45 \cdot \frac{\text{g}}{\text{cm}^3}$                  |

Concentration vs. Depth

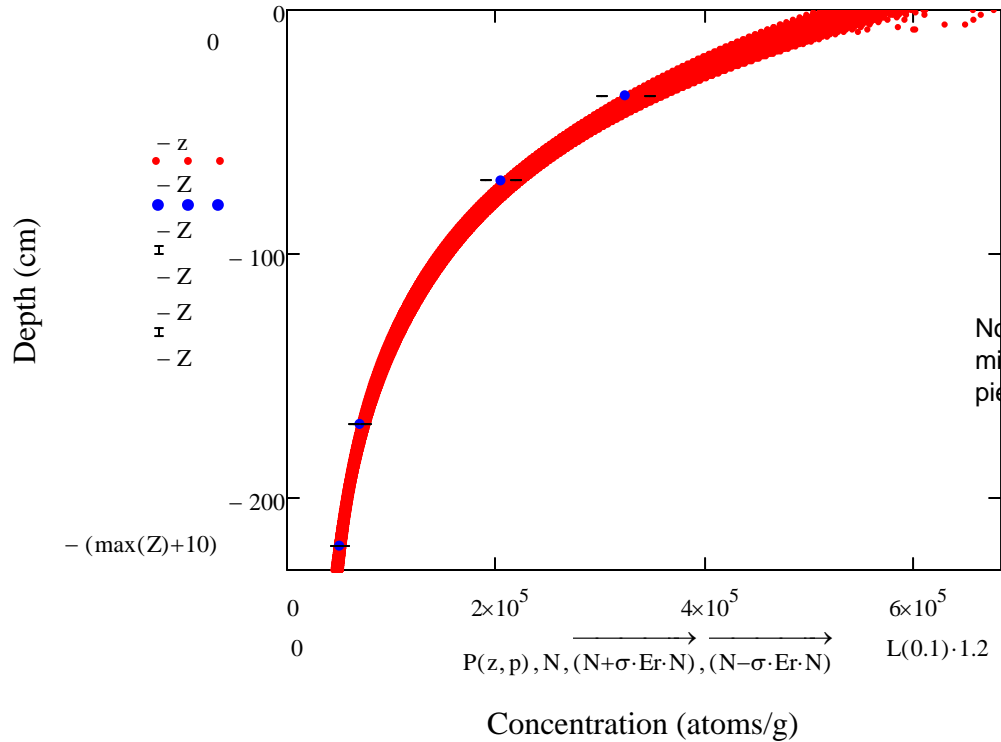

Note: the plot to the left may take a few minutes to generate if you have entered piecewise density values

l  
ie  
.

---





---











---

ta  
n  
.  
o  
d

at  
d

---

---

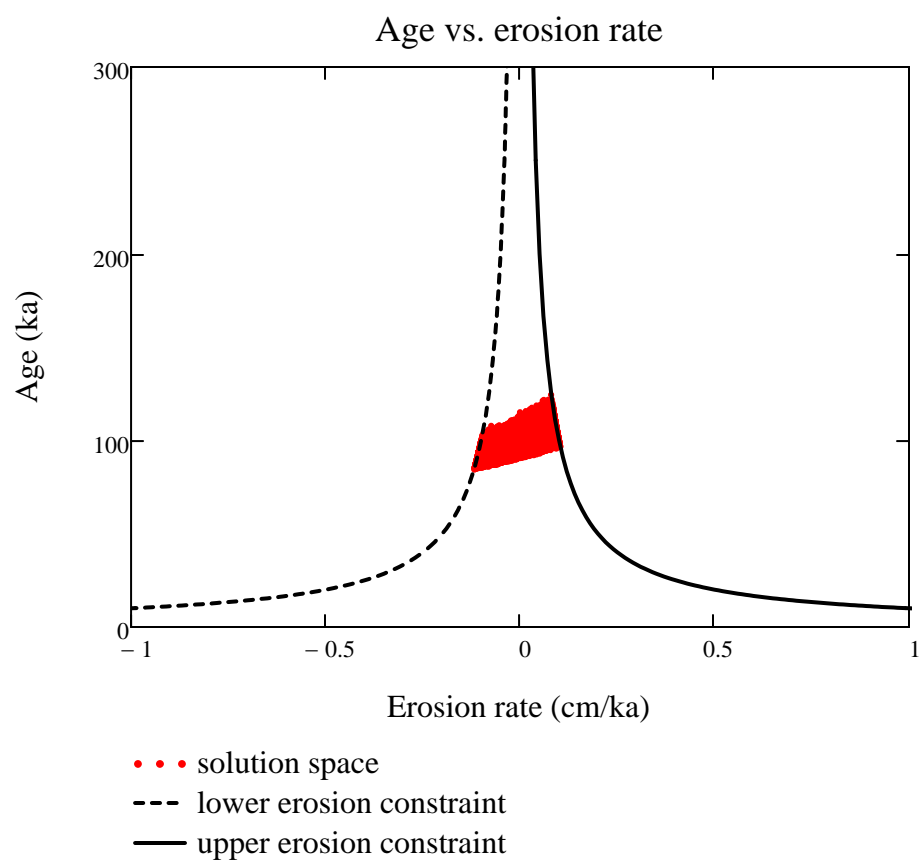

If you entered piecewise density data, the displayed values represent mean cumulative bulk densities at the depth of each sample





---

## CRONUS-Earth $^{10}\text{Be}$ - $^{26}\text{Al}$ exposure age calculator -- results

---

Version information --

Component

Version

Wrapper script:

2.2

Main calculator:

2.1

Constants:

2.2.1

Muons:

1.1

Comments:

**Production rate calibration information:**

Using default calibration data set

### $^{10}\text{Be}$ results:

Results not dependent on spallogenic production rate model:

Exposure ages -- constant production

Scaling scheme for spallation: Lal(1991) / Stone

| Sample name | Thickness scaling factor | Shielding factor | Production rate (muons) (atoms/g/yr) | Internal uncertainty (yr) | Exposure age (yr) | External uncertainty (yr) |
|-------------|--------------------------|------------------|--------------------------------------|---------------------------|-------------------|---------------------------|
| 6a-1        | 0.9833                   | 0.9989           | 0.194                                | 4961                      | 34730             | 5820                      |
| 6a-2        | 0.9833                   | 0.9989           | 0.194                                | 6256                      | 43080             | 7311                      |
| 6a-3        | 0.9833                   | 0.9989           | 0.194                                | 3168                      | 37952             | 4594                      |
| 6a-5        | 0.9590                   | 0.9989           | 0.194                                | 3992                      | 32485             | 4902                      |
| 6a-6        | 0.9833                   | 0.9989           | 0.194                                | 4845                      | 25661             | 5339                      |

Exposure ages -- time-varying production models:

| Sample name | Scaling scheme for spallation: | Desilets and others (2003,2006) |                           | Dunai (2001)      |                           | Lifton and others (2005) |                           | Exposure age (yr) |
|-------------|--------------------------------|---------------------------------|---------------------------|-------------------|---------------------------|--------------------------|---------------------------|-------------------|
|             |                                | Exposure age (yr)               | External uncertainty (yr) | Exposure age (yr) | External uncertainty (yr) | Exposure age (yr)        | External uncertainty (yr) |                   |
| 6a-1        |                                | 36968                           | 6876                      | 35962             | 6675                      | 36171                    | 6298                      | 36171             |
| 6a-2        |                                | 44766                           | 8414                      | 43668             | 8191                      | 43623                    | 7684                      | 43623             |
| 6a-3        |                                | 39926                           | 5807                      | 38916             | 5642                      | 39011                    | 5068                      | 39011             |
| 6a-5        |                                | 34858                           | 5964                      | 33830             | 5774                      | 34087                    | 5389                      | 34087             |
| 6a-6        |                                | 28064                           | 6262                      | 27195             | 6059                      | 27473                    | 5862                      | 27473             |

### $^{26}\text{Al}$ results:

Results not dependent on spallogenic production rate model:

Exposure ages -- constant production

Scaling scheme for spallation: Lal(1991) / Stone

| Sample name | Thickness scaling factor | Shielding factor | Production rate (muons) (atoms/g/yr) | Internal uncertainty (yr) | Exposure age (yr) | External uncertainty (yr) |
|-------------|--------------------------|------------------|--------------------------------------|---------------------------|-------------------|---------------------------|
| 6a-1        | --                       | --               | --                                   | --                        | --                | --                        |
| 6a-2        | --                       | --               | --                                   | --                        | --                | --                        |
| 6a-3        | --                       | --               | --                                   | --                        | --                | --                        |
| 6a-5        | --                       | --               | --                                   | --                        | --                | --                        |
| 6a-6        | --                       | --               | --                                   | --                        | --                | --                        |

Exposure ages -- time-varying production models:

| Scaling scheme for spallation: | Desilets and others (2003,2006) |                           | Dunai (2001)      |                           | Lifton and others (2005) |                           | I                 |
|--------------------------------|---------------------------------|---------------------------|-------------------|---------------------------|--------------------------|---------------------------|-------------------|
| Sample name                    | Exposure age (yr)               | External uncertainty (yr) | Exposure age (yr) | External uncertainty (yr) | Exposure age (yr)        | External uncertainty (yr) | Exposure age (yr) |
| 6a-1                           | --                              | --                        | --                | --                        | --                       | --                        | --                |
| 6a-2                           | --                              | --                        | --                | --                        | --                       | --                        | --                |
| 6a-3                           | --                              | --                        | --                | --                        | --                       | --                        | --                |
| 6a-5                           | --                              | --                        | --                | --                        | --                       | --                        | --                |
| 6a-6                           | --                              | --                        | --                | --                        | --                       | --                        | --                |

<sup>26</sup>Al/<sup>10</sup>Be ratios (relative to t

(No Al-26 / Be-10 plot)

Sample

6a-1

6a-2

6a-3

6a-5

6a-6

---

## CRONUS-Earth $^{10}\text{Be}$ - $^{26}\text{Al}$ exposure age calculator -- results

---

Version information --

Component

Version

Wrapper script:

2.2

Main calculator:

2.1

Constants:

2.2.1

Muons:

1.1

Comments:

**Production rate calibration information:**

Using default calibration data set

### $^{10}\text{Be}$ results:

Results not dependent on spallogenic production rate model:

Exposure ages -- constant production

Scaling scheme for spallation: Lal(1991) / Stone

| Sample name | Thickness scaling factor | Shielding factor | Production rate (muons) (atoms/g/yr) | Internal uncertainty (yr) | Exposure age (yr) | External uncertainty (yr) |
|-------------|--------------------------|------------------|--------------------------------------|---------------------------|-------------------|---------------------------|
| 6a-1        | 0.9833                   | 0.9989           | 0.194                                | 7592                      | 42431             | 8907                      |
| 6a-2        | 0.9833                   | 0.9989           | 0.194                                | 10974                     | 55925             | 12824                     |
| 6a-3        | 0.9833                   | 0.9989           | 0.194                                | 5098                      | 47430             | 7395                      |
| 6a-5        | 0.9590                   | 0.9989           | 0.194                                | 5905                      | 39078             | 7250                      |
| 6a-6        | 0.9833                   | 0.9989           | 0.194                                | 6511                      | 29545             | 7175                      |

Exposure ages -- time-varying production models:

| Scaling scheme for spallation: | Desilets and others (2003,2006) |                           | Dunai (2001)      |                           | Lifton and others (2005) |                           |                   |
|--------------------------------|---------------------------------|---------------------------|-------------------|---------------------------|--------------------------|---------------------------|-------------------|
| Sample name                    | Exposure age (yr)               | External uncertainty (yr) | Exposure age (yr) | External uncertainty (yr) | Exposure age (yr)        | External uncertainty (yr) | Exposure age (yr) |
| 6a-1                           | 45018                           | 10638                     | 43615             | 10205                     | 43654                    | 9584                      | 43654             |
| 6a-2                           | 60505                           | 15777                     | 58085             | 14905                     | 58319                    | 14073                     | 58319             |
| 6a-3                           | 50472                           | 9618                      | 48614             | 9137                      | 48665                    | 8198                      | 48665             |
| 6a-5                           | 41716                           | 8902                      | 40453             | 8552                      | 40570                    | 7950                      | 40570             |
| 6a-6                           | 32488                           | 8597                      | 31348             | 8232                      | 31672                    | 7979                      | 31672             |

### $^{26}\text{Al}$ results:

Results not dependent on spallogenic production rate model:

Exposure ages -- constant production

Scaling scheme for spallation: Lal(1991) / Stone

| Sample name | Thickness scaling factor | Shielding factor | Production rate (muons) (atoms/g/yr) | Internal uncertainty (yr) | Exposure age (yr) | External uncertainty (yr) |
|-------------|--------------------------|------------------|--------------------------------------|---------------------------|-------------------|---------------------------|
| 6a-1        | --                       | --               | --                                   | --                        | --                | --                        |
| 6a-2        | --                       | --               | --                                   | --                        | --                | --                        |
| 6a-3        | --                       | --               | --                                   | --                        | --                | --                        |
| 6a-5        | --                       | --               | --                                   | --                        | --                | --                        |
| 6a-6        | --                       | --               | --                                   | --                        | --                | --                        |

Exposure ages -- time-varying production models:

| Scaling scheme for spallation: | Desilets and others (2003,2006) |                           | Dunai (2001)      |                           | Lifton and others (2005) |                           | I                 |
|--------------------------------|---------------------------------|---------------------------|-------------------|---------------------------|--------------------------|---------------------------|-------------------|
| Sample name                    | Exposure age (yr)               | External uncertainty (yr) | Exposure age (yr) | External uncertainty (yr) | Exposure age (yr)        | External uncertainty (yr) | Exposure age (yr) |
| 6a-1                           | --                              | --                        | --                | --                        | --                       | --                        | --                |
| 6a-2                           | --                              | --                        | --                | --                        | --                       | --                        | --                |
| 6a-3                           | --                              | --                        | --                | --                        | --                       | --                        | --                |
| 6a-5                           | --                              | --                        | --                | --                        | --                       | --                        | --                |
| 6a-6                           | --                              | --                        | --                | --                        | --                       | --                        | --                |

<sup>26</sup>Al/<sup>10</sup>Be ratios (relative to t

(No Al-26 / Be-10 plot)

Sample

6a-1

6a-2

6a-3

6a-5

6a-6

# DGC $^{10}\text{Be}$ depth profile simulator

version 1.0



## Site specific information:

### location:

latitude (deg)

xx.xxx

34.442

longitude (deg)

xxx.xxx

-119.2834

altitude (m)

xxxx

227

### topographic/geometric shielding:

The topographic shielding factor is 1 (no effect) as a default. If shielding has been measured, then an ascii text or Excel file can be loaded into the worksheet. To do this, right click on the disk icon below and select "Properties". From here you may specify your file type and path. This file should have two columns of data. Column 1 should contain a list of angular measurements of the horizon; column 2 should contain a list of azimuths associated with each horizon measurement. The program then makes a linear interpolation of the horizon based on these values and calculates a shielding factor. Additional shielding from samples collected on a dipping surface can be included if the strike and dip of the surface has been measured. If you already know your net topographic shielding factor, enter the value in the "define" field.

dipping surface?

strike (0 - 360)

0

dip (0-90; right hand rule)

0

horizon

☒ user defined shielding

☐ File input

...\DDCN\horizon.xls

or, define factor

0.9994

(fraction)

 shielding macro

Calculated or imputed shielding factor:  $S_T = 0.9994$

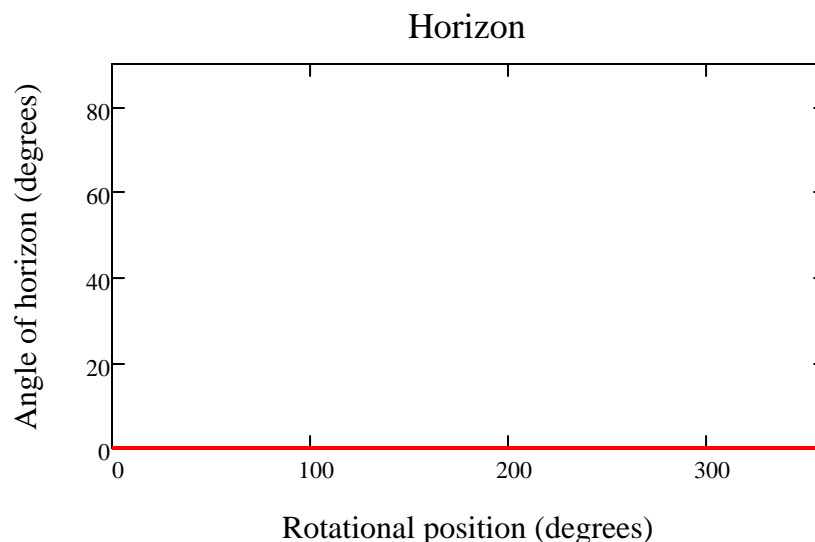



**cover (e.g. snow, loess etc.):**

This is your estimate of the percent change in production rate due to assumed periodic cover. Default is 1 (no effect).

cover factor (fraction)

## Spallogenic production rate:

### scaling scheme:

- ☒ Stone 2000 after Lal 1991  
☐ I know my spallogenic production rate  (atoms g<sup>-1</sup> a<sup>-1</sup>)

Reference production rate:  (atoms g<sup>-1</sup> a<sup>-1</sup>)

## Isotope:

- ☒ <sup>10</sup>Be (1.387 Ma)  
☐ <sup>26</sup>Al

## Production by muons:

This scheme follows the theoretical equations of Heisinger et al. 2002a, 2002b for production of muons vs depth. The approach of Balco 2008 is adopted to generate production rates via negative muon capture and fast muons at any given depth and altitude. A two-term exponential best fit for fast muons and a three-term exponential best fit for negative muon capture is then determined over the depth range defined below and for the altitude of the sampling location. The displayed depth range is for rock with a conservative high density of 2.7g/cm<sup>3</sup>, so in most cases the fitted depth will be deeper than indicated. The graphs below show the quality of each fit to the Heisinger equations over the specified mass-depth. A default depth range is set at 20 m. At a minimum, the depth range over which the muon terms are fit should be equal to the depth of your deepest sample plus the maximum net erosion of the surface.

depth of muon fit:  (m)



muon production

Mean relative error (%) of fit over depth range (fast muons): mean\_muf\_err = 0.0513573



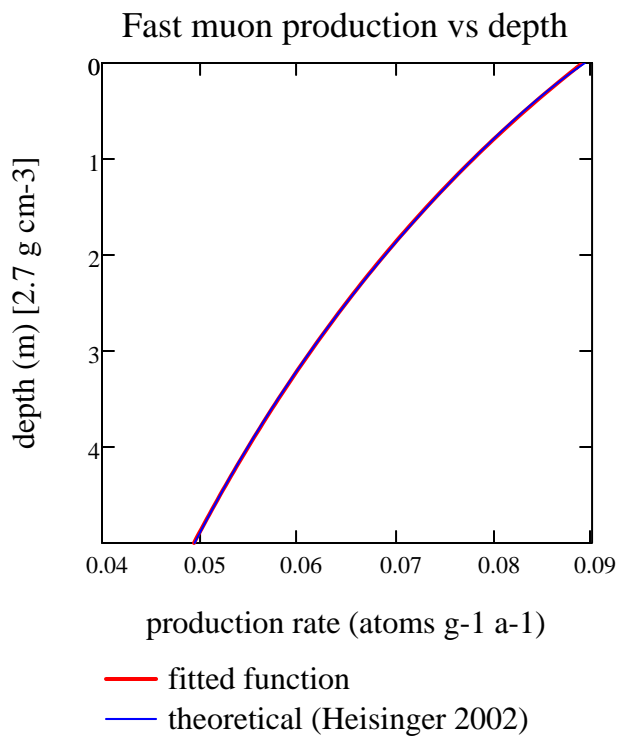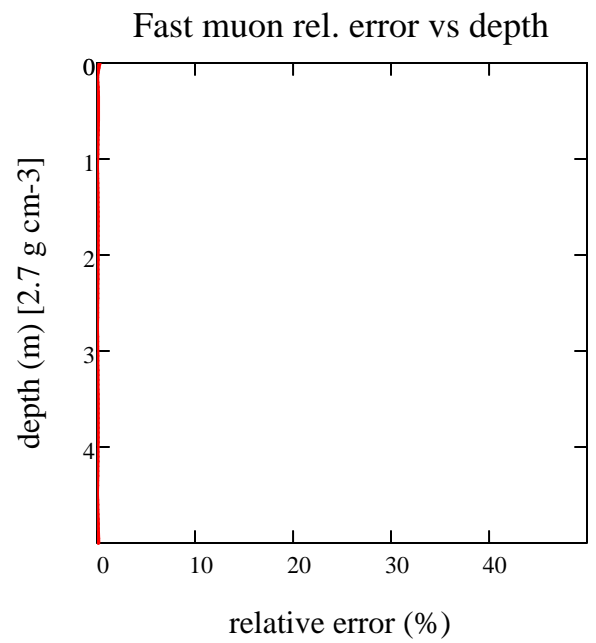

Mean relative error (%) of fit over depth range (fast muons):  $\text{mean\_mun\_err} = 0.2530822$

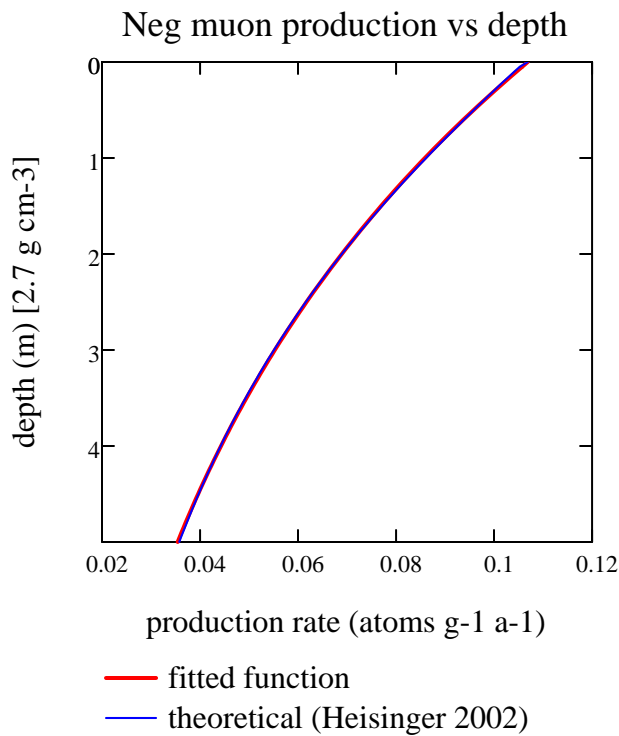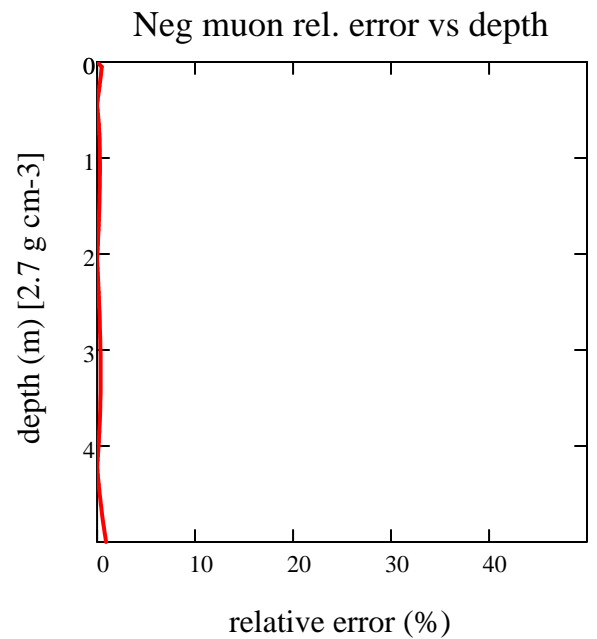

scaling macro

Calculated spallogenic production rate at surface (including shielding and cover):

$P_T = 5.0872649$  (atoms g<sup>-1</sup> a<sup>-1</sup>)

Calculated total muonic production rate at surface (muon shielding ignored):

$M_T = 0.196143$  (atoms g<sup>-1</sup> a<sup>-1</sup>)

How would you like to treat error in the production rates?

To treat as constant, enter the same high and low value, and 0 for the error; to treat as stochastic between high and low end members, enter the high and low values, and 0 for the error; to treat as normally distributed about a mean value, enter the mean value in both the high and low fields, and your estimate for the relative error. Since the total muogenic production rate is approximated by five exponential terms, only a normally distributed percent error is currently allowed. The entered value is applied to each muon production term.

spallogenic production rate:

low  (atoms g<sup>-1</sup> a<sup>-1</sup>)

high  (atoms g<sup>-1</sup> a<sup>-1</sup>)

1 $\sigma$  error  (%)

muonic production rate:

1 $\sigma$  error  (%)

attenuation length for neutrons:

the recommended attenuation length for your latitude is:  $\Lambda_n = 160$  (g cm<sup>-2</sup>)

neutrons

low  (g cm<sup>-2</sup>)

high  (g cm<sup>-2</sup>)

1 $\sigma$  error  (g cm<sup>-2</sup>)

Uncertainty in half life?

Half life is normally distributed about the 1 $\sigma$  error specified (enter 0 to not include this error).

1 $\sigma$  error  (%)



## Profile Data:

### depth of each sample:

Enter depths to the **top** of each sample (from shallowest to deepest) in your profile. Separate each value with a space.

  
(cm)

### thickness of each sample:

Enter thickness values for each sample in your profile. Separate each value with a space. Make sure the order of thicknesses matches those you entered in the "depth of samples" field

  
(cm)

### concentration of each sample:

Enter concentration values for each sample in your profile. Separate each value with a space. Make sure the order of values matches those you entered in the "depth of samples" field

  
(atoms g<sup>-1</sup>)

### 1 $\sigma$ total measurement error for each sample concentration:

Enter 1 sigma errors in concentration for each sample in your profile. Separate each value with a space. Make sure the order of values matches those you entered in the "depth of samples" field.

  
(fraction)

### Optional data input from file:

You may load your sample data from a text or Excel file rather than using the manual inputs above. To do this, first select the "file input" option below and then right click on the disk icon and select "Properties". From here you may specify your file type and path. Your data should be formatted as follows. Column order: sample depths, sample thicknesses, sample concentrations, 1 $\sigma$  measurement error. They should be in the same units as described above. The rows should be ordered by sample depth (from shallowest to deepest).

- ☐ Manual input  
☒ File input

...\\5bD\\conc.xls

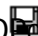

depth (cm)                      thickness (cm)                      concentration (atoms g<sup>-1</sup>)                      1σ concentration error (fraction)

$$Z = \begin{pmatrix} 5 \\ 35 \\ 65 \\ 95 \\ 135 \end{pmatrix}$$

$$\text{Th} = \begin{pmatrix} 10 \\ 10 \\ 10 \\ 10 \\ 10 \end{pmatrix}$$

$$N = \begin{pmatrix} 37310 \\ 32080 \\ 32180 \\ 31510 \\ 16540 \end{pmatrix}$$

$$\text{Er} = \begin{pmatrix} 0.0471723 \\ 0.0317955 \\ 0.0369795 \\ 0.0393526 \\ 0.0551995 \end{pmatrix}$$

## Bulk Density:

You may vary bulk density with depth by entering parameters for a step function describing measured or assumed changes in density with depth (e.g., if you measured density to be  $2.1 \pm 0.2 \text{ g cm}^{-3}$  between 0-30 cm,  $2.3 \pm 0.1 \text{ g cm}^{-3}$  between 30-60 cm, and  $2.4 \pm 0.2 \text{ g cm}^{-3}$  at depths greater than 60 cm, then you would enter the numbers 0 30 60--space delimited--in the "depths" field, the numbers 2.1 2.3 2.4 in the "densities" field, and the numbers 0.2 0.1 0.2 in the "density errors" field). You may also treat bulk density as a constant with depth; you can chose either a random or normal distribution for this constant value. As a check, your depth function is displayed in the plots below.

Constant density with depth; values varies randomly or normally:

low  (g cm<sup>-3</sup>)

high  (g cm<sup>-3</sup>)

1 $\sigma$  error  (g cm<sup>-3</sup>)

Measured values for densities at different depths; values are normally distributed (do not use for constant density with depth):

depths  (cm)

densities  (g cm<sup>-3</sup>)

1 $\sigma$  density errors  (g cm<sup>-3</sup>)

 density macro

Measured Density vs. Depth

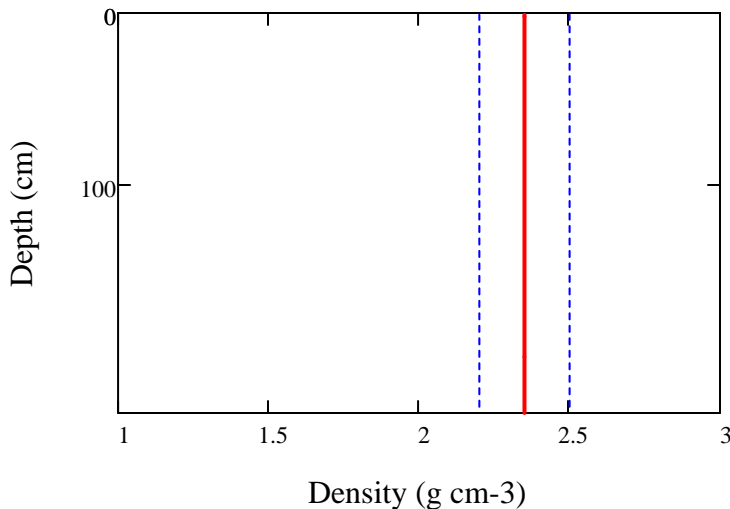

Cumulative Density (Bulk) vs. Depth

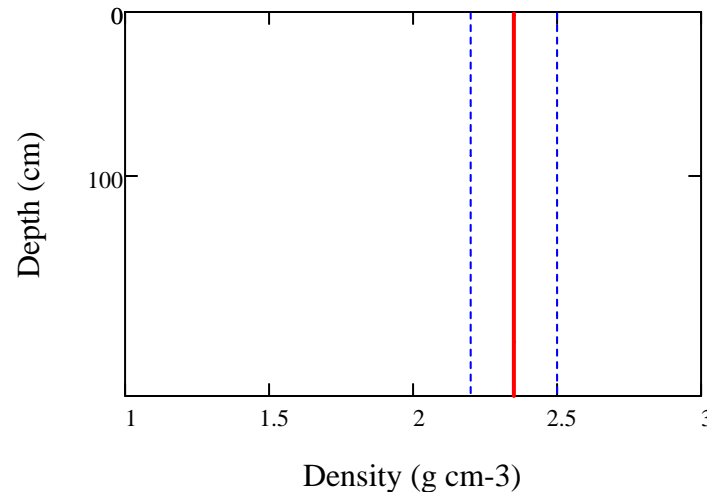

## Monte Carlo Simulator:

### parameter values for simulation:

In the fields below, enter boundary conditions for the parameters you wish to stochastically simulate. To specify a known value for a parameter, enter the expected value in both the "low" and "high" fields; for this option you will have to enter  $1\sigma$  relative error in the expected value as well. You may constrain the simulation by erosion rate, as well as erosion.

|                  | age                                |     | net erosion                     |      | erosion rate                    |                        | inheritance                        |                          |
|------------------|------------------------------------|-----|---------------------------------|------|---------------------------------|------------------------|------------------------------------|--------------------------|
| low              | <input type="text" value="1000"/>  | (a) | <input type="text" value="30"/> | (cm) | <input type="text" value="1"/>  | (cm ka <sup>-1</sup> ) | <input type="text" value="0"/>     | (atoms g <sup>-1</sup> ) |
| high             | <input type="text" value="25000"/> | (a) | <input type="text" value="60"/> | (cm) | <input type="text" value="20"/> | (cm ka <sup>-1</sup> ) | <input type="text" value="25000"/> | (atoms g <sup>-1</sup> ) |
| 1 $\sigma$ error | <input type="text" value="0"/>     | (a) |                                 |      | <input type="text" value="0"/>  | (cm ka <sup>-1</sup> ) | <input type="text" value="0"/>     | (atoms g <sup>-1</sup> ) |

### random permutations:

The simulation works by creating profiles from values sampled with the desired distribution from each of the above parameters. The total number of profiles needed to get a good grasp of your solution space depends on how well you can constrain each of the parameters. Thus, it is more useful to specify a population of profiles that fit within a certain degree of confidence for your data, than to specify a number of total random profiles to create. This simulation will generate a profile, generate a reduced chi-squared value from that profile, and determine if that value is as good or better than the value generated from the data in your profile at the confidence window you specify; it will then continue until (n) profiles pass this chi-squared test. The total number of profiles needed to collect (n) "good" profiles is also displayed (m).

desired confidence ( $\sigma$ ):

define chi-squared:



**Max chi-squared value that will be collected\*:**       $\chi^2 = 60$

\*The simulation will only look for solutions with a lower reduced chi-squared value than that shown above. If your profile data is significantly scattered, then you may not be able to obtain low enough chi-squared values for certain confidence levels. In this case, it will be necessary to run the simulation at a higher cutoff for the chi-squared statistic. Although counter-intuitive, increasing your desired confidence level accomplishes this. This is easier to think of in terms of fitting curves to data points with error bars. A dataset may not allow any theoretical profile to fit the  $1\sigma$  (68% confidence) data error, but allow profiles to fit the larger  $2\sigma$  (95.4% confidence) error. Incidentally, a higher confidence results in a faster simulation as it is easier to find possible solutions within the larger error window.

n

**number of profiles within specified confidence:**

100000

note: the best way to use this simulator is to start with low (n) values and do quick test simulations to tune the model to your data before running a very long high (n) value simulation. This allows you to do three things: 1) you can check the graphs below to see if the ranges you chose for your simulated parameters agree with the span of possible solutions for the parameter and then increase or decrease those ranges accordingly, 2) you can get an estimate for how long your simulation will take at higher (n) values (simulation time is linear), and 3) in the unfortunate circumstance of highly scattered data, you can run a quick test to see if it is even possible to find solutions better than your chi-squared cutoff (if it takes the program more than minute to find just 1 solution, then it probably will not be very useful for you to continue at that level of confidence). An (n) value of at least 100,000 is recommended for any final estimate of a given parameter.



## Results:

total number of simulated profiles:  $m = 7422791$

**Mode, mean, and median values for age, inheritance, and erosion rate:**

|                        |                                           |                                                                           |                                                                          |
|------------------------|-------------------------------------------|---------------------------------------------------------------------------|--------------------------------------------------------------------------|
| mean values:           | $AGE_{\text{mean}} = 6.6 \cdot \text{ka}$ | $INH_{\text{mean}} = 1.78 \cdot 10^4 \cdot \frac{\text{atoms}}{\text{g}}$ | $E_{\text{rate}}_{\text{mean}} = 7.37 \cdot \frac{\text{cm}}{\text{ka}}$ |
| median values:         | $AGE_{\text{med}} = 6.4 \cdot \text{ka}$  | $INH_{\text{med}} = 1.81 \times 10^4 \cdot \frac{\text{atoms}}{\text{g}}$ | $E_{\text{rate}}_{\text{med}} = 6.94 \cdot \frac{\text{cm}}{\text{ka}}$  |
| modal values:          | $AGE_{\text{mo}} = 5.4 \cdot \text{ka}$   | $INH_{\text{mo}} = 2.00 \times 10^4 \cdot \frac{\text{atoms}}{\text{g}}$  | $E_{\text{rate}}_{\text{mo}} = 5.6 \cdot \frac{\text{cm}}{\text{ka}}$    |
| lowest $\chi^2$ value: | $AGE_{\chi} = 7.4 \cdot \text{ka}$        | $INH_{\chi} = 1.51 \times 10^4 \cdot \frac{\text{atoms}}{\text{g}}$       | $E_{\text{rate}}_{\chi} = 6.61 \cdot \frac{\text{cm}}{\text{ka}}$        |
| maximum value:         | $AGE_{\text{max}} = 12.6 \cdot \text{ka}$ | $INH_{\text{max}} = 2.36 \times 10^4 \cdot \frac{\text{atoms}}{\text{g}}$ | $E_{\text{rate}}_{\text{max}} = 17.11 \cdot \frac{\text{cm}}{\text{ka}}$ |
| minumum value:         | $AGE_{\text{min}} = 2.9 \cdot \text{ka}$  | $INH_{\text{min}} = 8.60 \times 10^3 \cdot \frac{\text{atoms}}{\text{g}}$ | $E_{\text{rate}}_{\text{min}} = 2.98 \cdot \frac{\text{cm}}{\text{ka}}$  |



The range in age, inheritance, and erosion values shown in these plots represent the range over your specified confidence

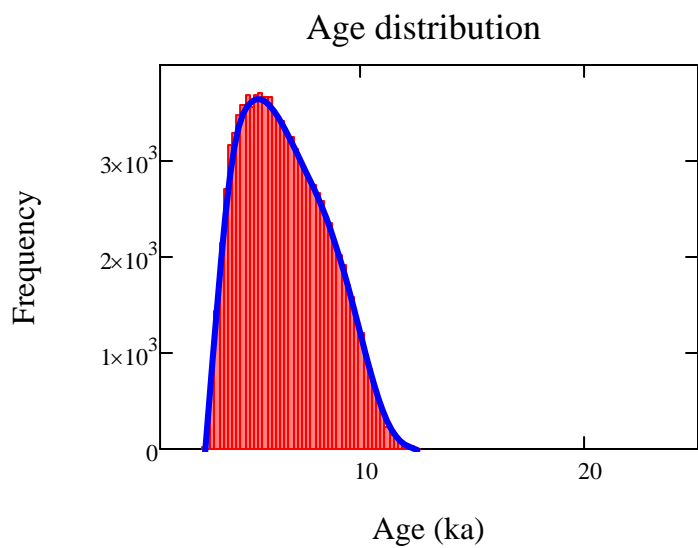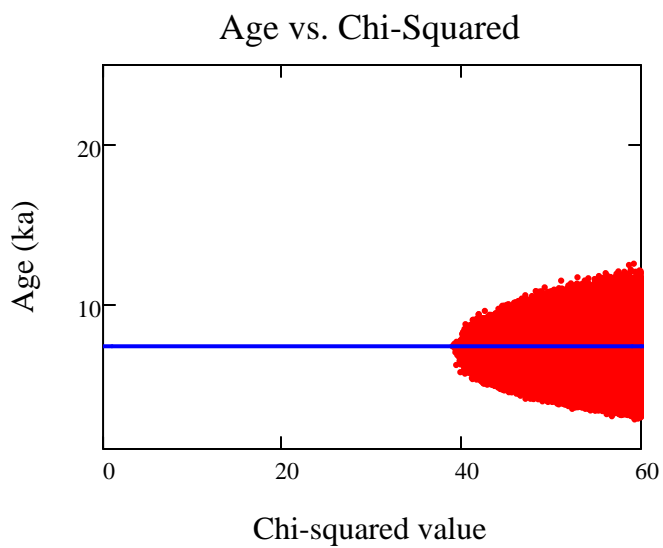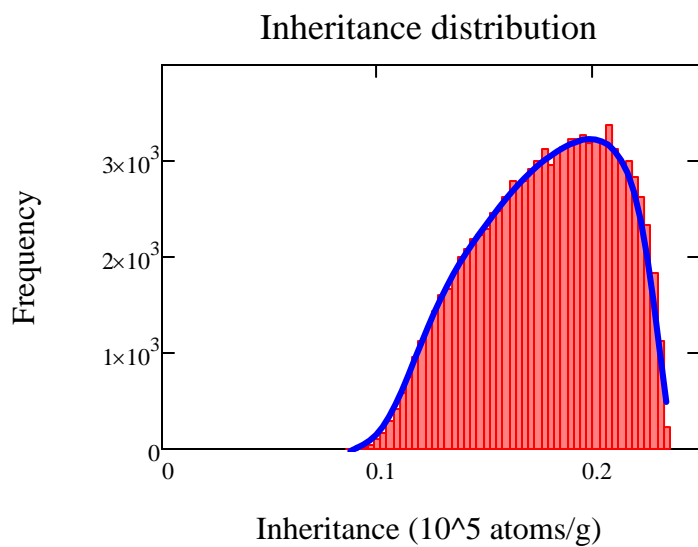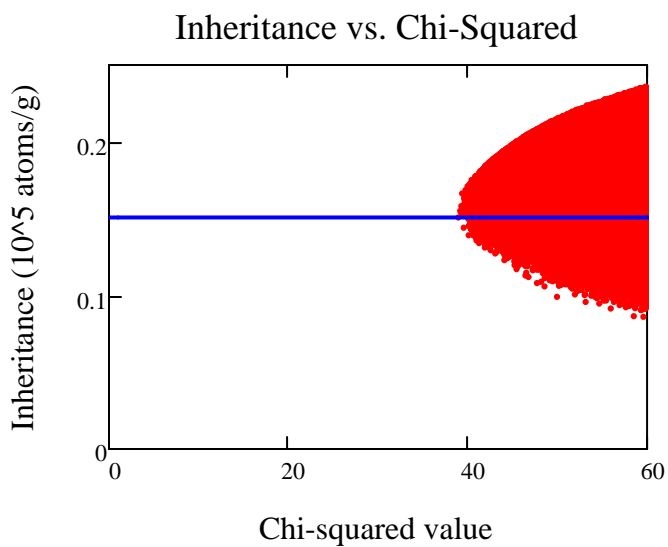

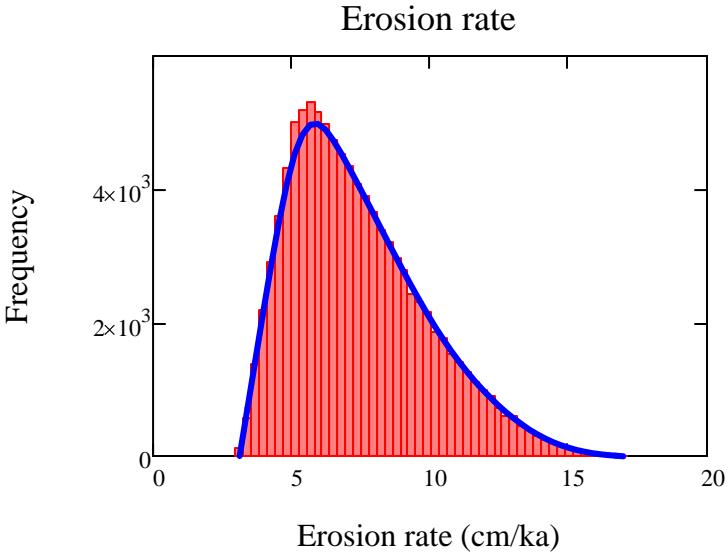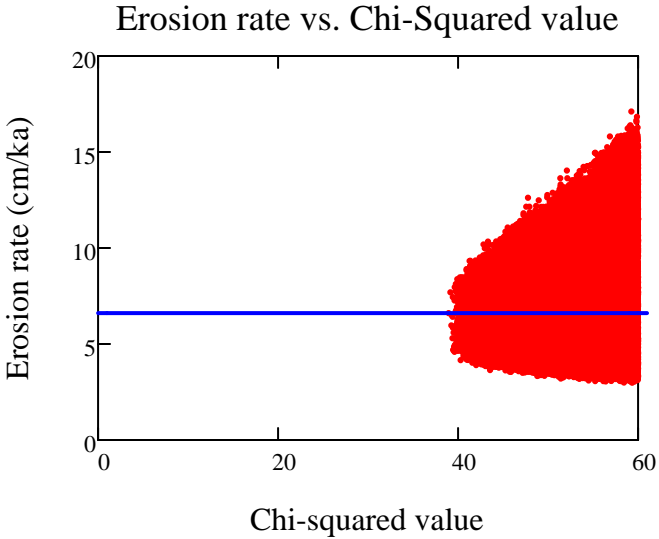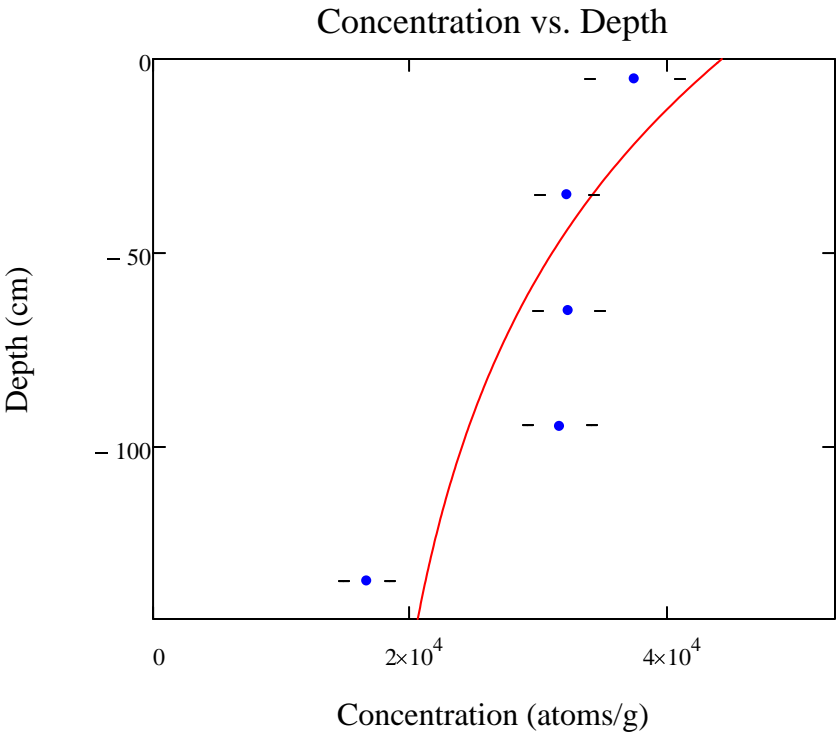

parameters yielding best fit (lowest  $\chi^2$  value):

|                       |                                                           |
|-----------------------|-----------------------------------------------------------|
| $\chi^2_{\text{min}}$ | $\chi^2_{\text{min}} = 38.943481$                         |
| $t_0$                 | $t_0 = 7.4 \text{ ka}$                                    |
| $e_0$                 | $e_0 = 6.606 \frac{\text{cm}}{\text{ka}}$                 |
| $i_0$                 | $i_0 = 1.51 \times 10^4 \frac{\text{atoms}}{\text{g}}$    |
| $n_0$                 | $n_0 = 174 \frac{\text{g}}{\text{cm}^2}$                  |
| $p_0$                 | $p_0 = 5.03 \frac{\text{atoms}}{\text{g} \cdot \text{a}}$ |
| $m_0$                 | $m_0 = 0.2 \frac{\text{atoms}}{\text{g} \cdot \text{a}}$  |
| $\rho$                | $\rho = 2.21 \frac{\text{g}}{\text{cm}^3}$                |

Concentration vs. Depth

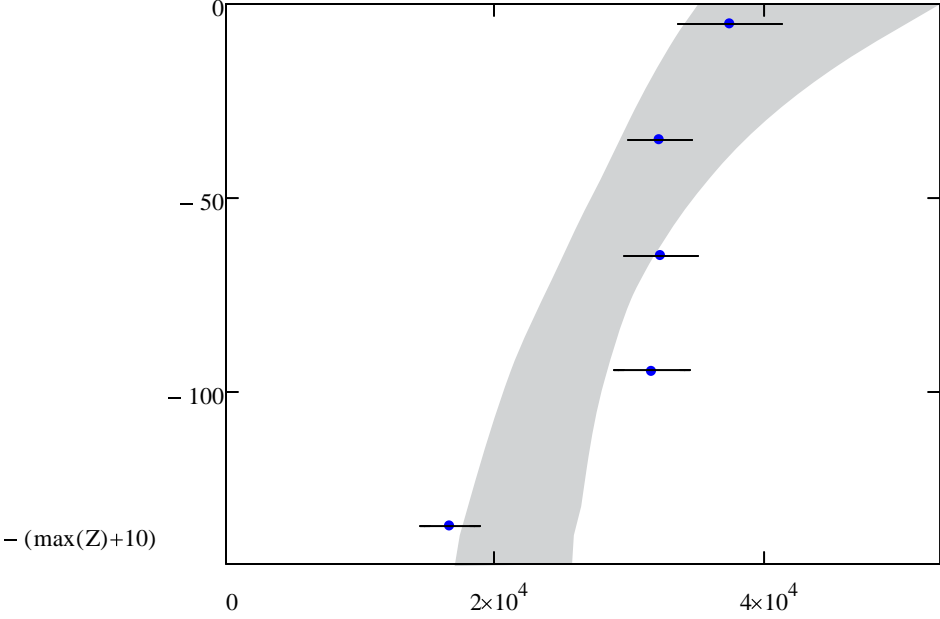

Concentration (atoms/g)

l  
ie  
.

---

















---

ta  
n  
.  
o  
d

at  
d

---

---

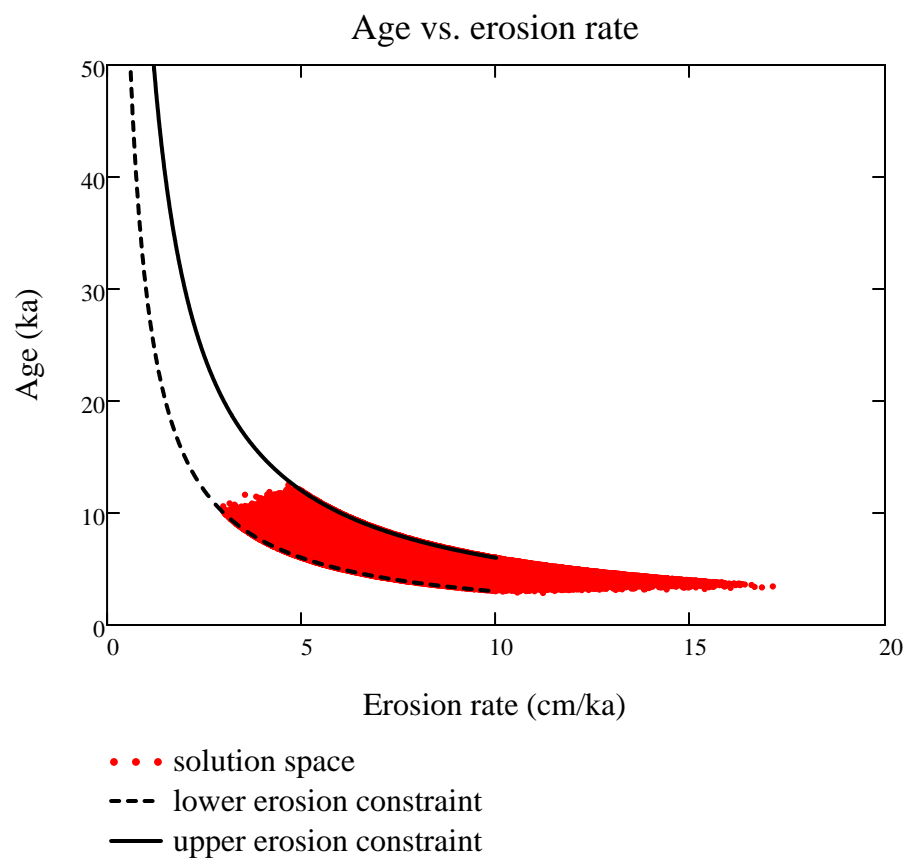

If you entered piecewise density data, the displayed values represent mean cumulative bulk densities at the depth of each sample
